# Supplementary material for: Ribavirin as a potential therapeutic for atypical teratoid/rhabdoid tumors
Source: PubMed Central journal article supplement (PMC5814281; doi:10.18632/oncotarget.23883), 2018-01-03
Supplement: oncotarget-09-8054-s001.pdf [file oncotarget-09-8054-s001.pdf]

# Ribavirin as a potential therapeutic for atypical teratoid/ rhabdoid tumors

## SUPPLEMENTARY MATERIALS

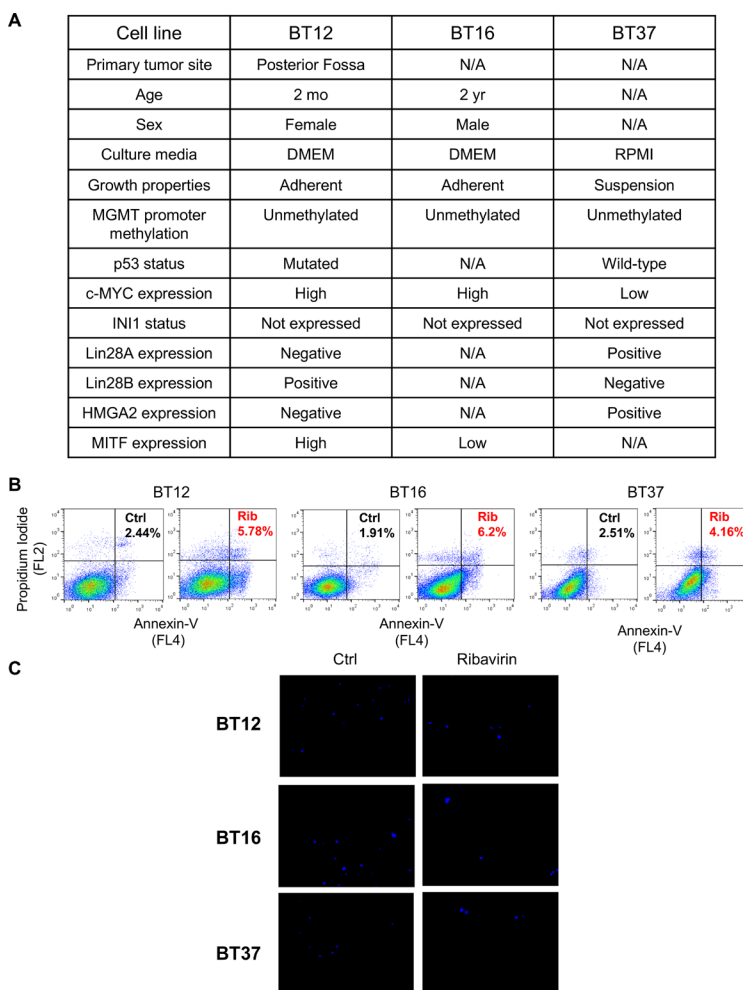

**Supplementary Figure 1: AT/RT cell line characteristics and ribavirin effects on AT/RT cell death and invasion.** (A) Table outlining core features and characteristics of the AT/RT cell lines BT12, BT16, and BT37 used in the study. (B) Representative flow cytometry plots of Annexin-V/Propidium Iodide-stained BT12, BT16, and BT37 cells treated with ribavirin (50 $\mu$ M) or vehicle control for 72hrs. (C) Additional representative photographs of Boyden chamber assay. Invasion of control cells (Ctrl) and ribavirin-treated cells (50  $\mu$ M) was assessed using a Boyden chamber assay. Panels show representative photographs taken after 16 hrs. Invading cell number was significantly decreased for BT12 and BT16 ribavirin-treated cells compared to vehicle-treated control cells at 16 hrs ( $*p < 0.05$ ,  $n = 3$ ).

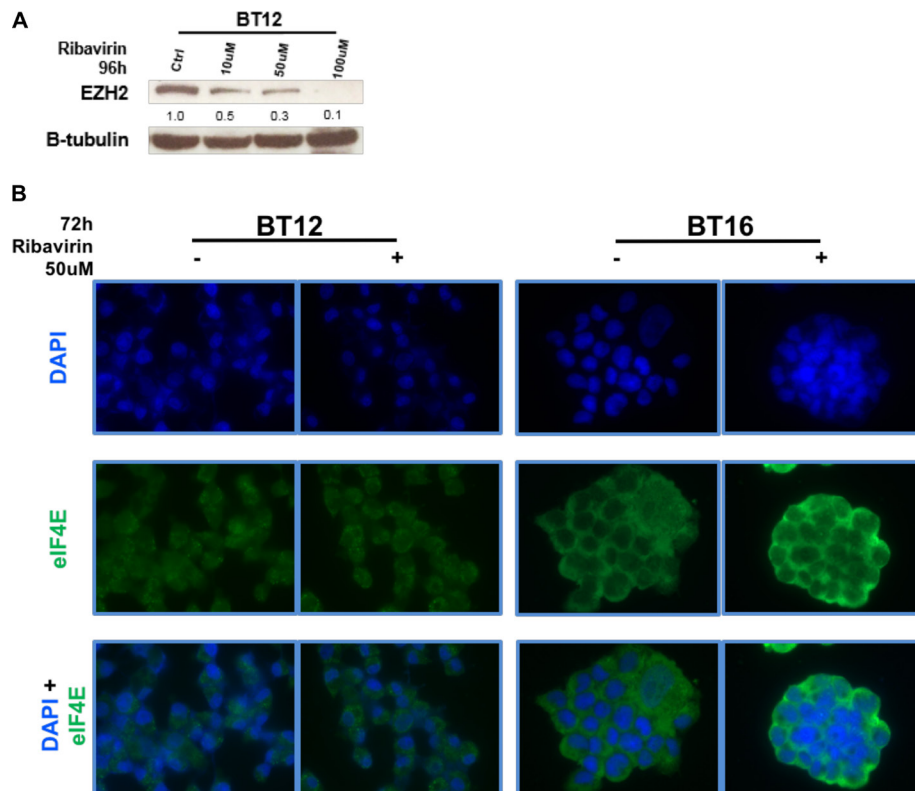

**Supplementary Figure 2: EZH2 expression in BT12 cells and eIF4E subcellular localization in BT12 and BT16 cells following ribavirin treatment.** (A) Western blot analyses of EZH2 expression in BT12 cells after 96hrs of varying doses (10  $\mu$ M, 50  $\mu$ M, and 100  $\mu$ M) of ribavirin treatment. Ribavirin treatment leads to a dose-dependent decrease in EZH2 expression. (B) Immunofluorescence experiments for eIF4E were performed to determine its subcellular localization in BT12 and BT16 cells after 72 hrs of treatment with ribavirin (50  $\mu$ M). Overall, DAPI and eIF4E co-staining reveal no difference in eIF4E localization in ribavirin or vehicle-treated cells. eIF4E was found to be mainly cytoplasmic in both control and ribavirin-treated samples.
